# Supplementary material for: Comparative Genomic Analysis of Globally Dominant ST131 Clone with Other Epidemiologically Successful Extraintestinal Pathogenic Escherichia coli (ExPEC) Lineages
Source: PubMed Central journal article supplement (PMC5654935; doi:10.1128/mbio.01596-17), 2017-10-24
Supplement: mbo005173554st1.pdf [file mbo005173554st1.pdf]

**S.Table1: Information and genomic characteristics of in-house sequenced strains**

| <b>Strain</b> | <b>Disease status</b>     | <b>Collection date</b> | <b>ST</b> | <b># Contigs</b> | <b>Genome size</b> | <b>G+C %</b> | <b>CDS</b> | <b>Coding %</b> | <b># rRNAs</b> | <b># tRNAs</b> |
|---------------|---------------------------|------------------------|-----------|------------------|--------------------|--------------|------------|-----------------|----------------|----------------|
| NA023         | Prostitis                 | 12-03-2009             | ST648     | 176              | 5192057            | 50.57        | 5073       | 86.8            | 5              | 74             |
| NA081         | UTI                       | 10-08-2009             | ST405     | 223              | 5238190            | 50.5         | 5051       | 86.6            | 6              | 69             |
| NA090         | Septicemia                | 09-02-2009             | ST38      | 193              | 5373103            | 50.41        | 5267       | 86.2            | 20             | 89             |
| NA101         | Pyelonephritis            | 05-10-2009             | ST131     | 175              | 5286008            | 50.72        | 5238       | 87.2            | 12             | 80             |
| NA112         | Pyrexia of unknown origin | 03-11-2009             | ST131     | 168              | 5148591            | 50.78        | 5081       | 87.3            | 6              | 68             |
