# Supplementary material for: Comparative Genomic Analysis of Globally Dominant ST131 Clone with Other Epidemiologically Successful Extraintestinal Pathogenic Escherichia coli (ExPEC) Lineages
Source: PubMed Central journal article supplement (PMC5654935; doi:10.1128/mbio.01596-17), 2017-10-24
Supplement: mbo005173554st2.pdf [file mbo005173554st2.pdf]

**S.Table2: Strains used for comparative analysis**

| S.no | Strain Name    | WGS project/<br>SRA Accession | Isolation source                     | ST    |
|------|----------------|-------------------------------|--------------------------------------|-------|
| 1    | LAU-EC10       | AYNJ01                        | gastrointestinal                     | ST38  |
| 2    | IS1            | CBWA01                        | Unknown                              | ST38  |
| 3    | 1-110-08_S4_C1 | JHDK01                        | stool                                | ST38  |
| 4    | 1-392-07_S1_C1 | JNPT01                        | stool                                | ST38  |
| 5    | 1-392-07_S1_C2 | JNPU01                        | stool                                | ST38  |
| 6    | 6-175-07_S1_C2 | JOMS01                        | stool                                | ST38  |
| 7    | 6-175-07_S1_C3 | JORL01                        | stool                                | ST38  |
| 8    | upec-221       | JSKR01                        | patient with urinary tract infection | ST38  |
| 9    | upec-133       | JSNS01                        | patient with urinary tract infection | ST38  |
| 10   | blood-10-180   | JSPS01                        | blood from patient with bacteremia   | ST38  |
| 11   | blood-10-0183  | JSQQ01                        | blood from patient with bacteremia   | ST38  |
| 12   | NA090          | MVIO01                        | Septicemia                           | ST38  |
| 13   | LAU-EC5        | AYOG01                        | Gastrointestinal                     | ST405 |
| 14   | LAU-EC4        | AYOP01                        | Gastrointestinal                     | ST405 |
| 15   | upec-211       | JSLB01                        | patient with urinary tract infection | ST405 |
| 16   | blood-90544    | JSPE01                        | blood from patient with bacteremia   | ST405 |
| 17   | blood-90543    | JSPF01                        | blood from patient with bacteremia   | ST405 |
| 18   | blood-9-0292   | JSPI01                        | blood from patient with bacteremia   | ST405 |
| 19   | blood-10-0554  | JSQN01                        | blood from patient with bacteremia   | ST405 |
| 20   | blood-10-0541  | JSQO01                        | blood from patient with bacteremia   | ST405 |
| 21   | blood-09-0464  | JSRM01                        | blood from patient with bacteremia   | ST405 |
| 22   | NA081          | JSXM01                        | patient with Urinary tract infection | ST405 |
| 23   | BIDMC 19C      | AXLI01                        | Urine                                | ST648 |
| 24   | LAU-EC8        | AYNH01                        | gastrointestinal                     | ST648 |
| 25   | LAU-EC9        | AYNI01                        | gastrointestinal                     | ST648 |
| 26   | 668            | AYQW01                        | Unknown                              | ST648 |
| 27   | IS5            | CBWB01                        | Unknown                              | ST648 |

|    |           |            |                            |         |
|----|-----------|------------|----------------------------|---------|
| 28 | ECONIH1   | CP009859.1 | rectal swab                | ST648   |
| 29 | BIDMC 43a | JAPF01     | Blood Culture              | ST648   |
| 30 | BIDMC 19B | JAPI01     | Urine                      | ST648   |
| 31 | BIDMC 19A | JAPJ01     | Bronchoalveolar Lavage     | ST648   |
| 32 | BIDMC 17B | JAPK01     | Peritoneal Fluid           | ST648   |
| 33 | BIDMC 17A | JAPL01     | Blood Culture              | ST648   |
| 34 | BIDMC 3   | JAPP01     | Swab, Abdominal Incision   | ST648   |
| 35 | BIDMC 2B  | JAPQ01     | Blood Culture              | ST648   |
| 36 | BIDMC 6   | JAPV01     | Bile                       | ST648   |
| 37 | LR09      | JDVF01     | wastewater treatment plant | ST648   |
| 38 | BIDMC 82  | JJMY01     | urine                      | ST648   |
| 39 | CR694     | JTGI01     | urine                      | ST648   |
| 40 | NA023     | JSXK01     | Prostitis                  | ST648   |
| 41 | SE15      | AP009378.1 | feces                      | ST131-A |
| 42 | S120EC    | ERR161283  | Blood                      | ST131-A |
| 43 | S26EC     | ERR161245  | Urine                      | ST131-A |
| 44 | S2EC      | ERR161235  | Urine                      | ST131-A |
| 45 | S31EC     | ERR161300  | Urine                      | ST131-A |
| 46 | S34EC     | ERR161247  | Urine                      | ST131-A |
| 47 | S37EC     | ERR161302  | Urine                      | ST131-A |
| 48 | S5EC      | ERR161236  | Urine                      | ST131-A |
| 49 | S94EC     | ERR161257  | Blood                      | ST131-A |
| 50 | HVM1147   | ERR161318  | Peritoneal fluid           | ST131-B |
| 51 | HVM2044   | ERR161323  | Blood                      | ST131-B |
| 52 | HVM2289   | ERR161325  | Urine                      | ST131-B |
| 53 | HVM277    | ERR161315  | Urine                      | ST131-B |
| 54 | HVM52     | ERR161308  | Urine                      | ST131-B |
| 55 | S104EC    | ERR161267  | Urine                      | ST131-B |
| 56 | S105EC    | ERR161268  | Urine                      | ST131-B |
| 57 | S114EC    | ERR161277  | Urine                      | ST131-B |
| 58 | S128EC    | ERR161291  | Blood                      | ST131-B |
| 59 | S19EC     | ERR161241  | Urine                      | ST131-B |
| 60 | S21EC     | ERR161242  | Urine                      | ST131-B |
| 61 | S22EC     | ERR161243  | Urine                      | ST131-B |
| 62 | S24EC     | ERR161244  | Urine                      | ST131-B |
| 63 | S32EC     | ERR161301  | Urine                      | ST131-B |
| 64 | S6EC      | ERR161299  | Urine                      | ST131-B |
| 65 | S79EC     | ERR161305  | Urine                      | ST131-B |
| 66 | B36EC     | ERR161254  | Blood                      | ST131-C |

|     |         |           |                   |         |
|-----|---------|-----------|-------------------|---------|
| 67  | HVM1299 | ERR161320 | Abdominal abscess | ST131-C |
| 68  | HVM1619 | ERR161321 | Surgical wound    | ST131-C |
| 69  | HVM1997 | ERR161322 | Urine             | ST131-C |
| 70  | HVM3017 | ERR161328 | Urine             | ST131-C |
| 71  | HVM3189 | ERR161329 | Urine             | ST131-C |
| 72  | HVM5    | ERR161306 | Urine             | ST131-C |
| 73  | HVM826  | ERR161316 | Blood             | ST131-C |
| 74  | HVM834  | ERR161317 | Urine             | ST131-C |
| 75  | HVR2496 | ERR161326 | Blood             | ST131-C |
| 76  | HVR83   | ERR161311 | Blood             | ST131-C |
| 77  | IR18E   | ERR458470 | Unknown           | ST131-C |
| 78  | IR49    | ERR458471 | Unknown           | ST131-C |
| 79  | IR65    | ERR458472 | Unknown           | ST131-C |
| 80  | IR68    | ERR458473 | Unknown           | ST131-C |
| 81  | MS2481  | ERR161252 | Blood             | ST131-C |
| 82  | MS2493  | ERR161253 | Blood             | ST131-C |
| 83  | P146EC  | ERR161313 | Rectal swab       | ST131-C |
| 84  | P189EC  | ERR161314 | Rectal swab       | ST131-C |
| 85  | P50EC   | ERR161307 | Rectal swab       | ST131-C |
| 86  | P53EC   | ERR161309 | Rectal swab       | ST131-C |
| 87  | P56EC   | ERR161310 | Rectal swab       | ST131-C |
| 88  | S100EC  | ERR161263 | Rectal swab       | ST131-C |
| 89  | S101EC  | ERR161264 | Rectal swab       | ST131-C |
| 90  | S102EC  | ERR161265 | Urine             | ST131-C |
| 91  | S103EC  | ERR161266 | Urine             | ST131-C |
| 92  | S107EC  | ERR161270 | Urine             | ST131-C |
| 93  | S108EC  | ERR161271 | Blood             | ST131-C |
| 94  | S109EC  | ERR161272 | Urine             | ST131-C |
| 95  | S10EC   | ERR161237 | Urine             | ST131-C |
| 96  | S110EC  | ERR161273 | Urine             | ST131-C |
| 97  | S111EC  | ERR161274 | Urine             | ST131-C |
| 98  | S112EC  | ERR161275 | Urine             | ST131-C |
| 99  | S113EC  | ERR161276 | Rectal swab       | ST131-C |
| 100 | S115EC  | ERR161278 | Urine             | ST131-C |
| 101 | S116EC  | ERR161279 | Unknown           | ST131-C |
| 102 | S117EC  | ERR161280 | Unknown           | ST131-C |
| 103 | S118EC  | ERR161281 | Urine             | ST131-C |
| 104 | S119EC  | ERR161282 | Blood             | ST131-C |
| 105 | S11EC   | ERR161238 | Urine             | ST131-C |

|     |         |            |                                           |         |
|-----|---------|------------|-------------------------------------------|---------|
| 106 | S121EC  | ERR161284  | Urine                                     | ST131-C |
| 107 | S122EC  | ERR161285  | Urine                                     | ST131-C |
| 108 | S123EC  | ERR161286  | Urine                                     | ST131-C |
| 109 | S124EC  | ERR161287  | Urine                                     | ST131-C |
| 110 | S125EC  | ERR161288  | Surgical wound                            | ST131-C |
| 111 | S126EC  | ERR161289  | Urine                                     | ST131-C |
| 112 | S127EC  | ERR161290  | Urine                                     | ST131-C |
| 113 | S129EC  | ERR161292  | Urine                                     | ST131-C |
| 114 | S12EC   | ERR161239  | Urine                                     | ST131-C |
| 115 | S130EC  | ERR161293  | Urine                                     | ST131-C |
| 116 | S131EC  | ERR161294  | Urine                                     | ST131-C |
| 117 | S132EC  | ERR161295  | Urine                                     | ST131-C |
| 118 | S133EC  | ERR161296  | Blood                                     | ST131-C |
| 119 | S134EC  | ERR161297  | Urine                                     | ST131-C |
| 120 | S135EC  | ERR161298  | Blood                                     | ST131-C |
| 121 | S15EC   | ERR161240  | Urine                                     | ST131-C |
| 122 | S1EC    | ERR161234  | Urine                                     | ST131-C |
| 123 | S30EC   | ERR161246  | Urine                                     | ST131-C |
| 124 | S39EC   | ERR161248  | Unknown                                   | ST131-C |
| 125 | S43EC   | ERR161249  | Unknown                                   | ST131-C |
| 126 | S47EC   | ERR161250  | Unknown                                   | ST131-C |
| 127 | S53EC   | ERR161251  | Unknown                                   | ST131-C |
| 128 | S65EC   | ERR161303  | Urine                                     | ST131-C |
| 129 | S77EC   | ERR161304  | Urine                                     | ST131-C |
| 130 | S92EC   | ERR161255  | Blood                                     | ST131-C |
| 131 | S93EC   | ERR161256  | Blood                                     | ST131-C |
| 132 | S95EC   | ERR161258  | Blood                                     | ST131-C |
| 133 | NA097   | JSXJ01     | Urine sample from patient with Septicemia | ST131-C |
| 134 | NA101   | JSXN01     | Pyelonephritis                            | ST131-C |
| 135 | NA112   | JSXO01     | Pyrexia of unknown origin                 | ST131-C |
| 136 | NA114   | CP002797.2 | urine                                     | ST131-C |
| 137 | JJ1886  | CP006784.1 | patient with fatal urosepsis              | ST131-C |
| 138 | MNCRE44 | CP010876.1 | Sputum of sepsis patient                  | ST131-C |
| 139 | EC958   | HG941718.1 | urine                                     | ST131-C |
