# Supplementary material for: Comparative Genomic Analysis of Globally Dominant ST131 Clone with Other Epidemiologically Successful Extraintestinal Pathogenic Escherichia coli (ExPEC) Lineages
Source: PubMed Central journal article supplement (PMC5654935; doi:10.1128/mbio.01596-17), 2017-10-24
Supplement: mbo005173554st3.pdf [file mbo005173554st3.pdf]

**S.Table3: Plasmid profiles of 139 strains**

| S.No | Strain         | IncF          | IncHI2 | IncI1 | IncN | IncP | IncQ | IncB/O/K/Z | IncX1 | IncX3 | IncX4 | IncY |
|------|----------------|---------------|--------|-------|------|------|------|------------|-------|-------|-------|------|
|      | <b>ST38</b>    |               |        |       |      |      |      |            |       |       |       |      |
| 1    | upec-221       | -             | -      | -     | -    | P    | P    | -          | -     | -     | -     | -    |
| 2    | 6-175-07_S1_C3 | [F1:A-:B-]    | -      | -     | -    | -    | -    | -          | -     | -     | -     | -    |
| 3    | IS1            | [F1:A-:B23]   | -      | -     | -    | -    | -    | -          | -     | -     | -     | -    |
| 4    | 6-175-07_S1_C2 | [F1:A-:B33*]  | -      | -     | -    | -    | -    | -          | -     | -     | -     | -    |
| 5    | 1-392-07_S1_C1 | [F1:A-:B33]   | -      | -     | -    | -    | -    | -          | -     | -     | -     | -    |
| 6    | 1-392-07_S1_C2 | [F1:A-:B33]   | -      | -     | -    | -    | -    | -          | -     | -     | -     | -    |
| 7    | NA090          | [F1:A-:B33]   | -      | -     | -    | -    | -    | -          | -     | -     | -     | -    |
| 8    | 1-110-08_S4_C1 | [F2:A-:B10]   | -      | -     | -    | -    | -    | -          | -     | -     | -     | -    |
| 9    | LAU-EC10       | [F29:A4*:B10] | -      | -     | -    | -    | -    | -          | -     | -     | -     | -    |
| 10   | upec-133       | [F31:A4:B37*] | -      | -     | -    | -    | -    | -          | -     | -     | -     | -    |
| 11   | blood-10-180   | [F51:A-:B10]  | -      | -     | -    | -    | -    | -          | -     | -     | -     | -    |
| 12   | blood-10-0183  | [F51:A-:B10]  | -      | -     | -    | -    | -    | -          | -     | -     | -     | -    |
|      | <b>ST405</b>   |               |        |       |      |      |      |            |       |       |       |      |
| 1    | upec-211       | [F1:A1:B-]    | -      | P     | -    | -    | -    | P          | -     | -     | -     | -    |
| 2    | blood-90543    | [F1*:A1:B16]  | -      | -     | -    | -    | -    | P          | -     | -     | -     | -    |
| 3    | blood-90544    | [F1:A1:B16]   | -      | -     | -    | -    | -    | P          | -     | -     | -     | -    |
| 4    | blood-9-0292   | [F1:A1:B16]   | -      | -     | -    | -    | -    | -          | -     | -     | -     | -    |
| 5    | blood-09-0464  | [F1:A1:B16]   | -      | -     | -    | -    | -    | -          | -     | -     | -     | -    |
| 6    | blood-10-0554  | [F24:A-:B6]   | -      | -     | -    | -    | -    | -          | -     | -     | -     | -    |
| 7    | blood-10-0541  | [F24:A-:B6]   | -      | -     | -    | -    | -    | -          | -     | -     | -     | P    |
| 8    | NA081          | [F24:A-:B6]   | -      | -     | -    | -    | -    | -          | -     | -     | -     | P    |
| 9    | LAU-EC4        | [F36:A1:B10]  | -      | -     | -    | -    | -    | -          | -     | -     | -     | -    |
| 10   | LAU-EC5        | [F36:A1:B10]  | -      | -     | -    | -    | -    | -          | -     | -     | -     | -    |
|      | <b>ST648</b>   |               |        |       |      |      |      |            |       |       |       |      |
| 1    | BIDMC 19C      | -             | P      | -     | P    | -    | -    | -          | -     | -     | P     | -    |







|    |         |              |   |   |   |   |   |   |   |   |   |   |
|----|---------|--------------|---|---|---|---|---|---|---|---|---|---|
| 72 | S128EC  | [F24:A-:B40] | - | P | - | P | - | - | - | - | - | - |
| 73 | SE15    | [F29:A-:B10] | - | - | - | - | - | - | - | - | - | - |
| 74 | HVM1147 | [F29:A-:B10] | - | - | - | - | - | - | - | - | - | - |
| 75 | S104EC  | [F29:A-:B10] | - | - | - | - | - | - | - | - | - | - |
| 76 | S105EC  | [F29:A-:B10] | - | - | - | - | - | - | - | - | P | - |
| 77 | S114EC  | [F29:A-:B10] | - | - | - | - | - | - | - | - | - | - |
| 78 | S21EC   | [F29:A-:B10] | - | - | - | - | - | - | - | - | - | - |
| 79 | S22EC   | [F29:A-:B10] | - | - | - | - | - | - | - | - | - | - |
| 80 | S24EC   | [F29:A-:B10] | - | - | - | - | - | - | - | - | - | - |
| 81 | S5EC    | [F29:A-:B10] | - | - | - | - | - | - | - | - | - | - |
| 82 | S94EC   | [F29:A-:B10] | - | - | - | - | - | - | - | - | - | - |
| 83 | HVM3017 | [F31:A4:B1]  | - | - | - | - | - | - | - | - | - | - |
| 84 | IR18E   | [F31:A4:B1]  | - | - | - | - | - | - | - | - | - | - |
| 85 | IR68    | [F36:A1:B20] | - | - | - | - | - | - | - | - | - | - |
| 86 | MS2481  | [F36:A1:B20] | - | - | - | - | - | - | - | - | - | - |
| 87 | HVM1299 | [F36:A4:B1]  | - | - | - | - | - | - | - | - | - | - |
| 88 | S115EC  | [F36:A4:B1]  | - | - | - | - | - | - | - | - | - | - |
| 89 | S118EC  | [F36:A4:B1]  | - | - | - | - | - | - | - | - | - | - |
| 90 | S119EC  | [F36:A4:B1]  | - | - | - | - | - | - | - | - | - | - |
| 91 | NA112   | [F4:A-:B-]   | - | - | - | - | - | - | - | - | P | - |
| 92 | S79EC   | [F4:A-:B1]   | - | P | - | - | - | - | - | - | - | - |
| 93 | S19EC   | [F4:A-:B10]  | - | - | - | - | - | P | P | - | P | - |
| 94 | S124EC  | [F48:A1:B49] | - | - | - | - | P | - | - | - | P | P |
| 95 | S129EC  | [F48:A1:B49] | - | - | - | - | P | - | - | - | P | P |
| 96 | S133EC  | [F48:A1:B49] | - | - | - | - | P | - | - | - | - | - |
| 97 | S43EC   | [F51*:A-:B-] | - | - | - | - | - | - | - | - | - | - |
| 98 | S32EC   | [F51:A-:B10] | - | - | - | - | - | - | - | - | - | - |
| 99 | S6EC    | [F51:A-:B10] | - | - | P | - | - | - | - | - | - | - |

'P' indicates the presence of that particular plasmid class in the strain while '-' indicates its absence
