# Supplementary material for: Comparative Genomic Analysis of Globally Dominant ST131 Clone with Other Epidemiologically Successful Extraintestinal Pathogenic Escherichia coli (ExPEC) Lineages
Source: PubMed Central journal article supplement (PMC5654935; doi:10.1128/mbio.01596-17), 2017-10-24
Supplement: mbo005173554st4.pdf [file mbo005173554st4.pdf]

**S.Table4: List of orthologous proteins missing from ST131 strains**

| S.no | UNIPROT ID | Function                                   | COG ID  | COG class                                                         | COG Category                     |
|------|------------|--------------------------------------------|---------|-------------------------------------------------------------------|----------------------------------|
| 1    | V8KDQ1     | Lipopolysaccharide 1,2-glucyltransferase   | COG1442 | [M] Cell wall/membrane/envelope biogenesis                        | Cellular Processes And Signaling |
| 2    | V8JY35     | D-alanyl-D-alanine dipeptidase             | COG2173 | [M] Cell wall/membrane/envelope biogenesis                        | Cellular Processes And Signaling |
| 3    | V8KE30     | Betaine/carnitine/choline BCCT transporter | COG1292 | [M] Cell wall/membrane/envelope biogenesis                        | Cellular Processes And Signaling |
| 4    | V8KDC7     | Beta-1,4-galactyltransferase               | COG3306 | [M] Cell wall/membrane/envelope biogenesis                        | Cellular Processes And Signaling |
| 5    | V8K6U2     | Type-1 fimbrial protein subunit A          | COG3539 | [N] Cell motility                                                 | Cellular Processes And Signaling |
| 6    | V8K634     | Fimbrial protein                           | COG3539 | [N] Cell motility                                                 | Cellular Processes And Signaling |
| 7    | V8KUT9     | Fimbrial protein                           | COG3539 | [N] Cell motility                                                 | Cellular Processes And Signaling |
| 8    | V8KSH5     | Fimbrial protein                           | COG3539 | [N] Cell motility                                                 | Cellular Processes And Signaling |
| 9    | V8KT34     | Fimbrial protein                           | COG3539 | [N] Cell motility                                                 | Cellular Processes And Signaling |
| 10   | V8KUU3     | Fimbrial protein                           | COG3539 | [N] Cell motility                                                 | Cellular Processes And Signaling |
| 11   | V8K5N9     | Adhesin                                    | COG3539 | [N] Cell motility                                                 | Cellular Processes And Signaling |
| 12   | V8K6T9     | Membrane protein                           | COG0425 | [O] Posttranslational modification, protein turnover, chaperones  | Cellular Processes And Signaling |
| 13   | V8K087     | Diguanylate cyclase yddV                   | COG2199 | [T] Signal transduction mechanisms                                | Cellular Processes And Signaling |
| 14   | V8KAJ7     | Antitoxin MazE                             | COG2336 | [T] Signal transduction mechanisms                                | Cellular Processes And Signaling |
| 15   | V8K746     | Uncharacterized protein                    | COG3521 | [U] Intracellular trafficking, secretion, and vesicular transport | Cellular Processes And Signaling |
| 16   | V8K7E7     | Type VI secretion protein                  | COG3518 | [U] Intracellular trafficking, secretion, and vesicular transport | Cellular Processes And Signaling |
| 17   | V8K4Y2     | Membrane protein                           | COG3455 | [U] Intracellular trafficking, secretion, and vesicular transport | Cellular Processes And Signaling |
| 18   | V8K751     | CAD protein                                | COG3515 | [U] Intracellular trafficking, secretion, and vesicular transport | Cellular Processes And Signaling |
| 19   | V8K349     | UPF0214 protein YfeW                       | COG1680 | [V] Defense mechanisms                                            | Cellular Processes And Signaling |

|    |        |                                         |         |                                           |                                    |
|----|--------|-----------------------------------------|---------|-------------------------------------------|------------------------------------|
| 20 | V8KAZ7 | Toxin mazF                              | COG2337 | [V] Defense mechanisms                    | Cellular Processes And Signaling   |
| 21 | V8KFX2 | CRISPR-associated endonuclease Cas1     | COG1518 | [V] Defense mechanisms                    | Cellular Processes And Signaling   |
| 22 | V8JSL0 | Antitoxin YafN                          | COG2161 | [V] Defense mechanisms                    | Cellular Processes And Signaling   |
| 23 | V8K7W1 | Molecular chaperone                     | COG3121 | [W] Extracellular structures              | Cellular Processes And Signaling   |
| 24 | V8KUP8 | Fimbrial protein                        | COG3121 | [W] Extracellular structures              | Cellular Processes And Signaling   |
| 25 | V8KUP6 | Fimbrial chaperone BcfG                 | COG3121 | [W] Extracellular structures              | Cellular Processes And Signaling   |
| 26 | V8JKS1 | XRE family transcriptional regulator    | COG2944 | [K] Transcription                         | Information Storage And Processing |
| 27 | V8KUZ3 | Uncharacterized protein                 | COG2944 | [K] Transcription                         | Information Storage And Processing |
| 28 | V8K3J8 | Uncharacterized protein                 | COG4886 | [K] Transcription                         | Information Storage And Processing |
| 29 | V8K7W6 | Transcriptional regulator               | COG2207 | [K] Transcription                         | Information Storage And Processing |
| 30 | V8KFB9 | Transcriptional regulator               | COG1846 | [K] Transcription                         | Information Storage And Processing |
| 31 | V8KG32 | Transcriptional regulator               | COG1609 | [K] Transcription                         | Information Storage And Processing |
| 32 | V8KCQ7 | LysR family transcriptional regulator   | COG0583 | [K] Transcription                         | Information Storage And Processing |
| 33 | V8KVE3 | LysR family transcriptional regulator   | COG0583 | [K] Transcription                         | Information Storage And Processing |
| 34 | V8KFC2 | LysR family transcriptional regulator   | COG0583 | [K] Transcription                         | Information Storage And Processing |
| 35 | V8K0Z8 | HTH-type transcriptional regulator MurR | COG1737 | [K] Transcription                         | Information Storage And Processing |
| 36 | V8KIN4 | GntR family transcriptional regulator   | COG2188 | [K] Transcription                         | Information Storage And Processing |
| 37 | V8K2V1 | Transpase                               | COG5464 | [L] Replication, recombination and repair | Information Storage And Processing |
| 38 | V8JLS9 | Transpase                               | COG5464 | [L] Replication, recombination and repair | Information Storage And Processing |
| 39 | V8KCB7 | ATP-dependent helicase                  | COG1201 | [L] Replication, recombination and repair | Information Storage And Processing |
| 40 | V8K144 | Hydrogenase-4 subunit E                 | COG4237 | [C] Energy production and conversion      | Metabolism                         |
| 41 | V8K394 | Hydrogenase 3 membrane subunit          | COG0650 | [C] Energy production and conversion      | Metabolism                         |
| 42 | V8KTL4 | Glutamate symport transmembrane protein | COG1301 | [C] Energy production and conversion      | Metabolism                         |
| 43 | V8K3H5 | Formate hydrogenlyase subunit 7         | COG3260 | [C] Energy production and conversion      | Metabolism                         |

|    |        |                                                                                     |         |                                                                  |            |
|----|--------|-------------------------------------------------------------------------------------|---------|------------------------------------------------------------------|------------|
| 44 | V8K1L5 | Formate hydrogenlyase subunit 2                                                     | COG1142 | [C] Energy production and conversion                             | Metabolism |
| 45 | V8KF75 | Dioxygenase subunit beta                                                            | COG1018 | [C] Energy production and conversion                             | Metabolism |
| 46 | V8KMG1 | C4-dicarboxylate ABC transporter                                                    | COG3069 | [C] Energy production and conversion                             | Metabolism |
| 47 | V8K398 | (4Fe-4S)-binding protein                                                            | COG1143 | [C] Energy production and conversion                             | Metabolism |
| 48 | V8KT59 | Transporter                                                                         | COG0531 | [E] Amino acid transport and metabolism                          | Metabolism |
| 49 | V8JYJ9 | Peptide ABC transporter substrate-binding protein                                   | COG0747 | [E] Amino acid transport and metabolism                          | Metabolism |
| 50 | V8KV94 | Methylaspartate ammonia-lyase                                                       | COG3799 | [E] Amino acid transport and metabolism                          | Metabolism |
| 51 | V8KU99 | Glutamate mutase epsilon subunit                                                    | COG4865 | [E] Amino acid transport and metabolism                          | Metabolism |
| 52 | V8KFK2 | Uncharacterized protein                                                             | COG0366 | [G] Carbohydrate transport and metabolism                        | Metabolism |
| 53 | V8KJM8 | PTS alpha-glucide transporter subunit IIBC                                          | COG1263 | [G] Carbohydrate transport and metabolism                        | Metabolism |
| 54 | V8K583 | MFS transporter                                                                     | COG2814 | [G] Carbohydrate transport and metabolism                        | Metabolism |
| 55 | V8KJR6 | 6-phpho-alpha-glucidase                                                             | COG1486 | [G] Carbohydrate transport and metabolism                        | Metabolism |
| 56 | V8KIC3 | Probable UbiX-like flavin prenyltransferase                                         | COG0163 | [H] Coenzyme transport and metabolism                            | Metabolism |
| 57 | V8KI60 | Phenolic acid decarboxylase subunit C                                               | COG0043 | [H] Coenzyme transport and metabolism                            | Metabolism |
| 58 | V8KV99 | Cob(I)alamin adenosyltransferase/cobinamide ATP-dependent adenosyltransferase       | COG2109 | [H] Coenzyme transport and metabolism                            | Metabolism |
| 59 | V8KT09 | Glutamate mutase sigma subunit                                                      | COG2185 | [I] Lipid transport and metabolism                               | Metabolism |
| 60 | V8KFB6 | 3-phenylpropionate/cinnamic acid dioxygenase ferredoxin--NAD(+) reductase component | COG0446 | [I] Lipid transport and metabolism                               | Metabolism |
| 61 | V8K8D7 | Uncharacterized protein                                                             | COG1629 | [P] Inorganic ion transport and metabolism                       | Metabolism |
| 62 | V8K4L2 | Tautomerase PptA                                                                    | COG1942 | [Q] Secondary metabolites biosynthesis, transport and catabolism | Metabolism |

|    |        |                                                                        |         |                                                                  |                      |
|----|--------|------------------------------------------------------------------------|---------|------------------------------------------------------------------|----------------------|
| 63 | V8KDZ8 | 3-phenylpropionate/cinnamic acid dioxygenase subunit beta              | COG5517 | [Q] Secondary metabolites biosynthesis, transport and catabolism | Metabolism           |
| 64 | V8KGH6 | Uncharacterized protein                                                | COG3468 | -                                                                | Multiple-Classes     |
| 65 | V8K624 | Type VI secretion system protein Impl                                  | COG3456 | -                                                                | Multiple-Classes     |
| 66 | V8K1M2 | Transcriptional regulator                                              | COG3604 | -                                                                | Multiple-Classes     |
| 67 | V8KD21 | Tartrate dehydrogenase                                                 | COG0473 | -                                                                | Multiple-Classes     |
| 68 | V8JZ57 | Peptide ABC transporter permease                                       | COG0601 | -                                                                | Multiple-Classes     |
| 69 | V8K3H0 | Oxidoreductase                                                         | COG0651 | -                                                                | Multiple-Classes     |
| 70 | V8K3F4 | NADP-dependent oxidoreductase                                          | COG2130 | -                                                                | Multiple-Classes     |
| 71 | V8K4J6 | Methyl-accepting chemotaxis protein                                    | COG0840 | -                                                                | Multiple-Classes     |
| 72 | V8KS91 | Methyl-accepting chemotaxis protein                                    | COG0840 | -                                                                | Multiple-Classes     |
| 73 | V8K1L8 | Hydrogenase                                                            | COG0651 | -                                                                | Multiple-Classes     |
| 74 | V8K263 | Hydantoin racemase                                                     | COG0651 | -                                                                | Multiple-Classes     |
| 75 | V8KEY2 | Dioxygenase                                                            | COG4638 | -                                                                | Multiple-Classes     |
| 76 | V8K5Y2 | Adhesin                                                                | COG5295 | -                                                                | Multiple-Classes     |
| 77 | V8KEC3 | 3-phenylpropionate/cinnamic acid dioxygenase subunit alpha             | COG4638 | -                                                                | Multiple-Classes     |
| 78 | V8KGG9 | 3-phenylpropionate/cinnamic acid dioxygenase ferredoxin subunit        | COG2146 | -                                                                | Multiple-Classes     |
| 79 | V8KG59 | 3-phenylpropionate-dihydrodiol/cinnamic acid-dihydrodiol dehydrogenase | COG1028 | -                                                                | Multiple-Classes     |
| 80 | V8KHE5 | Invasion protein                                                       | COG0745 | [K] Transcription, [T] Signal transduction mechanisms            | Multiple-Classes     |
| 81 | V8K6U7 | Transcriptional regulator                                              | COG2197 | [T] Signal transduction mechanisms, [K] Transcription            | Multiple-Classes     |
| 82 | V8KL53 | Uncharacterized protein                                                | COG4804 | [R] General function prediction only                             | Poorly Characterized |
| 83 | V8KH81 | Multidrug ABC transporter ATP-binding protein                          | COG4178 | [R] General function prediction only                             | Poorly Characterized |

|     |        |                         |         |                                      |                      |
|-----|--------|-------------------------|---------|--------------------------------------|----------------------|
| 84  | V8K6I9 | Membrane protein        | COG2391 | [R] General function prediction only | Poorly Characterized |
| 85  | V8K9C1 | Lyase                   | COG1413 | [R] General function prediction only | Poorly Characterized |
| 86  | V8KIM2 | Uncharacterized protein | COG5435 | [S] Function unknown                 | Poorly Characterized |
| 87  | V8KB66 | Uncharacterized protein | COG4453 | [S] Function unknown                 | Poorly Characterized |
| 88  | V8KHN2 | Uncharacterized protein | COG3111 | [S] Function unknown                 | Poorly Characterized |
| 89  | V8KTZ8 | Toxin RelE              | COG4737 | [S] Function unknown                 | Poorly Characterized |
| 90  | V8JV47 | Membrane protein        | COG3152 | [S] Function unknown                 | Poorly Characterized |
| 91  | V8KN72 | Uncharacterized protein | COG1357 | [S] Function unknown                 | Poorly Characterized |
| 92  | V8KG33 | Uncharacterized protein | -       | -                                    | -                    |
| 93  | V8KQH5 | Uncharacterized protein | -       | -                                    | -                    |
| 94  | V8KAN6 | Uncharacterized protein | -       | -                                    | -                    |
| 95  | V8KCJ2 | Uncharacterized protein | -       | -                                    | -                    |
| 96  | V8KJU4 | Uncharacterized protein | -       | -                                    | -                    |
| 97  | V8K5J4 | Uncharacterized protein | -       | -                                    | -                    |
| 98  | V8KAC5 | Uncharacterized protein | -       | -                                    | -                    |
| 99  | V8KU12 | Uncharacterized protein | -       | -                                    | -                    |
| 100 | V8KSP2 | Uncharacterized protein | -       | -                                    | -                    |
| 101 | V8K756 | Uncharacterized protein | -       | -                                    | -                    |
| 102 | V8KVD3 | Uncharacterized protein | -       | -                                    | -                    |
| 103 | V8KV88 | Uncharacterized protein | -       | -                                    | -                    |
| 104 | V8JR73 | Uncharacterized protein | -       | -                                    | -                    |
| 105 | V8JR03 | Uncharacterized protein | -       | -                                    | -                    |
| 106 | V8K1W4 | Uncharacterized protein | -       | -                                    | -                    |
| 107 | V8JVI1 | Uncharacterized protein | -       | -                                    | -                    |
| 108 | V8KIP7 | Uncharacterized protein | -       | -                                    | -                    |
| 109 | V8KJP2 | Uncharacterized protein | -       | -                                    | -                    |
| 110 | V8KI19 | Uncharacterized protein | -       | -                                    | -                    |
| 111 | V8K8B8 | Uncharacterized protein | -       | -                                    | -                    |
| 112 | V8JX34 | Uncharacterized protein | -       | -                                    | -                    |
| 113 | V8KHM0 | Uncharacterized protein | -       | -                                    | -                    |
| 114 | V8K1A9 | Uncharacterized protein | -       | -                                    | -                    |
| 115 | V8K832 | Uncharacterized protein | -       | -                                    | -                    |
| 116 | V8KAI7 | Uncharacterized protein | -       | -                                    | -                    |

|     |        |                                               |   |   |   |
|-----|--------|-----------------------------------------------|---|---|---|
| 117 | V8K997 | Uncharacterized protein                       | - | - | - |
| 118 | V8KDD8 | Uncharacterized protein                       | - | - | - |
| 119 | V8K7F9 | Uncharacterized protein                       | - | - | - |
| 120 | V8JV31 | Uncharacterized protein                       | - | - | - |
| 121 | V8K619 | Uncharacterized protein                       | - | - | - |
| 122 | V8K629 | Type VI secretion protein                     | - | - | - |
| 123 | V8KIH3 | Type III effector protein                     | - | - | - |
| 124 | V8KHG4 | Type III effector protein                     | - | - | - |
| 125 | V8KHR0 | Type III effector                             | - | - | - |
| 126 | V8KJG9 | Type III effector                             | - | - | - |
| 127 | V8KJQ2 | Type III cell invasion protein SipB           | - | - | - |
| 128 | V8JSN6 | Toxin YafO                                    | - | - | - |
| 129 | V8JLC1 | Toxin RelE                                    | - | - | - |
| 130 | V8KID8 | SsRNA endonuclease                            | - | - | - |
| 131 | V8K633 | Membrane protein                              | - | - | - |
| 132 | V8K1E3 | Membrane protein                              | - | - | - |
| 133 | V8KDP0 | Membrane protein                              | - | - | - |
| 134 | V8K1U4 | Lipoprotein                                   | - | - | - |
| 135 | V8KTK9 | Glutamate mutase                              | - | - | - |
| 136 | V8K149 | Formate hydrogenlyase maturation protein HycH | - | - | - |
| 137 | V8KfV6 | DNA damage-inducible protein DnaD             | - | - | - |
| 138 | V8K463 | Deubiquitinase                                | - | - | - |
| 139 | V8KT14 | Acyl-CoA synthetase                           | - | - | - |
| 140 | V8KCI2 | Aankyrin                                      | - | - | - |
| 141 | V8KH92 | 4-hydroxybenzoate decarboxylase               | - | - | - |
| 142 | V8KVD8 | 3-methylaspartate ammonia-lyase               | - | - | - |

'-': not defined
